37 **ABSTRACT.** The evolution of bacteria is driven by random genetic mutations and horizontal  
38 gene transfer (HGT) of genetic material from other bacteria. HGT can occur via transformation,  
39 transduction, and conjugation. Here, we present a potential new mechanism of HGT which occurs  
40 in a syntrophic *Clostridium* coculture. We have previously shown that in syntrophic cocultures of  
41 *Clostridium acetobutylicum* and *Clostridium ljungdahlii*, the two organisms undergo heterologous  
42 cell fusion, which includes fusion of the peptidoglycan cell walls and membranes. Heterologous  
43 cell fusion facilitated a large-scale exchange of cytoplasmic protein and RNA between the two  
44 organisms, leading to the formation of hybrid bacterial cells containing cytoplasmic material of  
45 the two parent organisms. Here we present new evidence that cell fusion events also facilitate the  
46 exchange of plasmid DNA between the two organisms of the syntrophic coculture. Through the  
47 use of a selective subculturing process, we successfully isolated wild-type *C. acetobutylicum*  
48 clones which have acquired a portion of the plasmid DNA – containing the antibiotic resistance  
49 marker – from a recombinant strain of *C. ljungdahlii*. Fusion events led to formation of persistent  
50 aberrant hybrid cells with distinct morphogenetic characteristics. Furthermore, our data support  
51 the concept of a novel, interspecies, mechanism of acquiring antibiotic resistance. Since neither  
52 organism contains any known conjugation machinery or mechanism, these findings expand our  
53 understanding of multi-species microbiomes, their survival strategies, and evolution.

54

55 **IMPORTANCE.** Investigations of natural multispecies microbiomes and the field of synthetic  
56 and syntrophic microbial cocultures are attracting renewed interest based on their potential  
57 application in biotechnology, ecology, and medical fields. A variety of synthetic and natural  
58 cocultures have been examined in terms of their metabolic output, but relatively few systems have  
59 been interrogated at the cellular and molecular level. Previously, we have shown the syntrophic  
60 coculture of *C. acetobutylicum* and *C. ljungdahlii* undergoes heterologous cell-to-cell fusion,  
61 which facilitates the exchange of cytoplasmic protein and RNA between the two organisms, and  
62 leads to the formation of hybrid bacterial cells. Continuing this line of investigation, we now show  
63 that heterologous cell fusion between the two *Clostridium* organisms can also facilitate the

64 exchange of DNA between the two organisms. By applying selective pressures to this coculture  
65 system, we isolated clones of wild-type *C. acetobutylicum* which acquired the erythromycin  
66 resistance (*erm*) gene from the *C. ljungdahlii* strain carrying a plasmid with the *erm* gene. Fusion  
67 led to persistent hybrid cells containing DNA from both parents but with distinct properties and  
68 morphologies. Moreover, we provide evidence for a novel mechanism of acquiring antibiotic  
69 resistance mediated by the syntrophic interactions of this system. This is a major finding that may  
70 shed light on a new mechanism of bacteria's ability to acquire antibiotic resistance.

71

72 **KEY WORDS:** *Clostridium ljungdahlii*, *Clostridium acetobutylicum*, syntrophy, heterologous  
73 cell fusion, hybrid cells, DNA exchange, DNA integration, plasmid DNA, antibiotic resistance.

74

## 75 INTRODUCTION

76 The evolution of bacteria and other single-cell organisms is facilitated through genetic mutations  
77 and horizontal gene transfer (1-4). In mutation-driven evolution, a cell acquires a random  
78 beneficial mutation(s), which is then passed on to daughter cells. In comparison, in the horizontal  
79 gene transfer (HGT) process, cells acquire beneficial mutations in the form of transferred DNA  
80 from other cells, often from a different species (1). The first evidence for HGT was provided in  
81 1928, where pneumococci (in infected mice) exchanged virulence genes through the uptake of  
82 genetic DNA (1, 5). Since then, a great deal of gene transfer and genetic recombination examples  
83 have been demonstrated in the laboratory, while the genetic exchanges that occur in nature are  
84 believed to be widespread (1, 4). Horizontal gene transfer between bacteria can occur through  
85 various mechanisms, including transformation, transduction and conjugation.

86 Transformation is a process where competent cells take up genomic or plasmid DNA from  
87 their environment (1, 4). Natural competence has been observed under various environmental  
88 conditions, such as nutrient stress, involves 20 to 50 proteins (1), and has been documented in  
89 more than 80 species (3). Artificial competence can be developed in the laboratory through  
90 chemical treatment. The preparation of competent *E. coli* cells using  $\text{CaCl}_2$  treatment is an example  
91 (4). Transformation does not require cell-to-cell contact, as competent cells can take up foreign  
92 DNA from their environment. In transduction, DNA exchange between bacterial cells is carried  
93 out by a bacteriophage (4). This occurs when a portion of chromosomal DNA of a parent organism  
94 is accidentally packaged when a latent prophage excises from the genome. The phage containing  
95 the bacterial DNA can interact with and infect other cells, thus transferring the packaged DNA (4).  
96 Transduction does not require any cell-to-cell contact between cells either. Conjugation is the only  
97 known process where two bacterial cells have to interact physically in order to exchange DNA,  
98 which is mediated by a cell-to-cell junction through which the DNA passes (1). Conjugative DNA  
99 exchange has been characterized in most detail in Gram-negative bacteria, such as *E. coli*. The  
100 conjugative machinery is encoded on a conjugative plasmid or on integrative and conjugative  
101 elements (ICEs), a subset of which includes conjugative transposons (1, 2, 6). Conjugative

102 plasmids have been identified in *Clostridium* species, an example of which includes the well-  
103 studied conjugative pCW3-like plasmids in *Clostridium perfringens* (7). Transfer of conjugative  
104 transposons from the Tn916/Tn1545 family into several *Clostridium* species from *E. coli* and  
105 *Enterococcus faecalis* has been reported, including *C. tetani*, *C. acetobutylicum*, and *C.*  
106 *beijerinckii*, with transfer between members of the genus also reported (8-10). It was reported that  
107 a Tn1545 self-mobilizing transposon, that conferred both tetracycline and erythromycin resistance,  
108 was transferred from *C. beijerinckii* to *Eubacterium cellulosolvens* (11). Importantly, no native  
109 conjugation systems have been found in either the autotrophic acetogen *C. ljungdahlii* (*Clj*) or the  
110 heterotrophic solventogen *C. acetobutylicum* (*Cac*) (2).

111 The syntrophic coculture system work we have recently reported (12) provides evidence for a  
112 new and never-previously described mechanism for HGT between bacteria. Plasmid DNA  
113 (p100ptaHalo) was successfully transferred from the *Clj*-ptaHalo strain – expressing the HaloTag  
114 protein (13) – to the wild-type (WT) *Cac* in a syntrophic coculture of the two organisms. Plasmid  
115 or other DNA transfer between these two organisms cannot take place through natural competency.  
116 First, there is no evidence that either *Cac* or *Clj* can become naturally competent (2, 3), and both  
117 are difficult to transform, largely through electroporation and at low frequencies. Second, as we  
118 describe here, the Restriction-Modification (RM) system of *Cac* prevents transformation with *Clj*-  
119 propagated plasmids. Since neither organism possesses an identifiable conjugation machinery, the  
120 DNA exchange we report here must have occurred through the newly identified heterologous cell-  
121 to-cell fusion in the coculture of the two organisms (12). We also provide evidence for a new form  
122 of interspecies-mediated *Cac* acquisition of antibiotic (erythromycin) resistance.

123

## 124 **RESULTS**

125 **Enrichment and selection process for identification of *Cac* cells which have acquired plasmid**  
126 **DNA from the *Clj*-ptaHalo strain under coculture conditions.** To determine if DNA can be  
127 transferred between *Clj* and *Cac* under coculture conditions, four biological replicates of parent  
128 cocultures of the *Clj*-ptaHalo strain, carrying the 100ptaHalo plasmid, and the WT *Cac* were set up

129 (Figure 1). Parent cocultures were set up in a non-selective coculture medium used previously (80  
130 g/L glucose, 5 g/L fructose, no erythromycin) to encourage heterologous cell fusion (12, 14).  
131 p100ptaHalo carries the HaloTag gene and the erythromycin (Erm) resistance gene, *erm*, and can  
132 be propagated and expressed in both organisms (13). After 24 hrs, coculture samples were  
133 collected for subculturing and plating in selective media, chosen in order to enrich the cocultures  
134 in *Cac* cells that may have acquired the p100ptaHalo plasmid from the *Clj*-ptaHalo strain, while  
135 eliminating *Clj*-ptaHalo cells over time. The process involved subculturing in liquid medium for  
136 the first two passages, followed by plating on agar selection plates, and liquid subculturing of  
137 colonies from plates. Liquid subcultures were carried out in the selective Turbo CGM medium  
138 containing 80 g/L of glucose and no fructose, supplemented with 100 µg/mL of erythromycin. *Clj*  
139 cannot grow on glucose alone and its growth is in fact inhibited by such high glucose  
140 concentrations (14); fructose is the typical sugar on which *Clj* can grow. WT *Cac* cannot grow in  
141 the presence of 100 µg/mL of erythromycin, therefore erythromycin was used to eliminate WT  
142 *Cac* cells during the selection process. Liquid selection cultures were carried out in 100 mL bottles  
143 in an anaerobic chamber. Plating was done on 2xYTG plates, containing 5 g/L of glucose, no  
144 fructose, and 100 µg/mL of erythromycin.

145 To start the selection process, the first selection subculture (PX.1; see methods and Figure 1  
146 for numbering scheme) was cultivated in 25 mL of non-selective medium, containing 80 g/L  
147 glucose, 5 g/L fructose and no erythromycin for 24 hours. 5 mL samples from each PX.1 selection  
148 subculture were washed with Turbo CGM medium (80 g/L of glucose only, no fructose) and  
149 transferred to 25 mL (PX.2) of the selective liquid medium (glucose, Erm) to further enrich for  
150 plasmid-containing *Cac* cells. After 24 hrs, samples from subcultures PX.2 were streaked onto  
151 2xYTG selection plates (plate subculture PtPX.3; glucose, Erm) to begin isolating and testing  
152 single colonies. The selection plates PtPX.3 developed colonies after 2 days of incubation at 37°C,  
153 except for selection plate PtP3.3 which did not develop any colonies (Figure 1). Thus, the P3.2  
154 subculture was abandoned at that point. Eight to ten colonies were picked from each successful  
155 selection plate (PtP1.3, PtP2.3, & PtP4.3) and were subcultured in liquid selective medium. Half

156 of the selected colonies were heat-shocked at 80°C for 10 minutes, per standard *Cac* culture  
157 practice, to select and grow *Cac* cells that have sporulated. Heat shocking kills *Clj* cells, as they  
158 are unable to sporulate. Colonies from plates PtP1.3 and PtP2.3 did not survive heat shocking, but  
159 grew in liquid selection medium if not heat shocked. Colonies from plate PtP4.3 survived the heat  
160 shock, and grew in the liquid selection medium. All colonies that grew in liquid selection medium  
161 were then streaked again on the 2xYTG selection plates (PtPX.4), and the process was repeated  
162 once more (passages PtPX.5), aiming to identify *Cac* cells resistant to erythromycin. Finally, four  
163 individual colonies from plates PtP1.5, PtP2.5, and PtP4.5 were grown in liquid selection medium,  
164 and analyzed using microscopy, flow cytometry for fluorescent protein (HaloTag) expression,  
165 metabolite analysis, and PCR assays to determine whether plasmid DNA was transferred from *Clj*-  
166 ptaHalo to the WT *Cac* cells during subculturing in selective media.  
167

168 **Coculture mediated transfer of plasmid DNA from *Clj*-ptaHalo strain to WT *Cac*.** The  
169 phenotype of subcultured cells and clones was assessed based on seven characteristics:

- 170 1) Survival of the heat-shock selection (*Cac* cells only)
- 171 2) Growth on 2xYTG plate surface (*Cac* cells only)
- 172 3) Growth on glucose only (*Cac* cells only)
- 173 4) Production of butanol & acetone (*Cac* cells only)
- 174 5) Growth with erythromycin (only possible if cells contain and express the *erm* gene)
- 175 6) HaloTag fluorescence (only possible if cells contain and express the HaloTag gene)
- 176 7) Production of isopropanol (coculture phenotype only (14): both *Cac* and *Clj* cells must be  
177 present or proteins from *Clj* present in *Cac* or *Cac* proteins present in *Clj*).

178 The phenotypic characteristics of the starting coculture partners (*Clj*-ptaHalo and WT *Cac*), the  
179 expected phenotype of *Cac* cells that carry the plasmid p100ptaHalo, and the phenotype displayed  
180 by the clones of the PtP4.5 plate are summarized in Table 1. Of the four parent cocultures (Figure  
181 1), only individual colonies/clones from the PtP4.5 plate (4 originally and several more  
182 subsequently) showed all expected phenotypes of *Cac* cells that acquired p100ptaHalo from the

183 *Clj-ptaHalo* strain, with the exception of the plasmid-specific HaloTag fluorescence phenotype  
184 (Table 1). They: 1) survived the heat shock, 2) formed colonies on 2xYTG plate surface, 3) grew  
185 on glucose as a substrate, and 4) produced butanol and acetone (Figure S1), all of which are *Cac*-  
186 specific characteristics. Since these clones produce the characteristic solvents of *Cac* cells, the  
187 clones must contain these solventogenic genes, which are coded on the pSOL1 megaplasmid. Loss  
188 of pSOL1 results also in an asporogenous phenotype (15), and thus the ability of the clones to  
189 withstand the heat shock further confirms the presence of pSOL1. Significantly, no isopropanol  
190 was detected in cultures of this PtP4.5 strain despite the presence of 40 mM acetone (Figure S1),  
191 indicating the selection process worked at eliminating all *Clj-ptaHalo* cells from the original  
192 coculture. Any small amounts of acetone are readily converted to isopropanol by *Clj* cells (14).  
193 Erm resistance of the clones from the PtP4.5 plate can only be explained by the presence of the  
194 *erm* gene in the isolated clones. However, PtP4.5 clones did not show any red fluorescence when  
195 labeled with the red HaloTag ligand Janelia Fluor (Figure S2). Analysis of the earlier clones (from  
196 plates PtP4.3 and PtP4.4) showed that ~30% of PtP4.3 cells exhibited red fluorescence, while  
197 PtP4.4 cells did not show any red fluorescence (Figures S2 and S3). Thus, during the 4<sup>th</sup> selective  
198 passage (plate PtP4.4), cells lost the ability to produce sufficient levels of the functional HaloTag  
199 protein for fluorescence detection. To sum, these data show that at least a part of the p100ptaHalo  
200 plasmid, carrying the *erm* gene was transferred to *Cac*. The transfer of p100ptaHalo was examined  
201 in detail using PCR assays in the following section. To further confirm the identity of the clones  
202 from the PtP4.5 plate as *Cac* cells, we examined *Cac*-P4.5 clones morphologically using  
203 transmission electron microscopy (TEM). After 24 hrs of growth, *Cac*-P4.5 cells had the  
204 appearance of WT *Cac* cells (12): they displayed large translucent regions (granulose formed in  
205 preparation for spore formation) in their cytoplasm and a few fully formed *Cac*-P4.5 spores were  
206 observed (Figure 2). *Clj* cells (Figure S4) appear only as homogeneously electron dense (dark)  
207 vegetative cells (12), and no such cells were detected via TEM analysis.

208



209 **Table 1.** Phenotypic checklist of parent strains used for the starting coculture (*Clj*-ptaHalo and  
 210 WT *Cac*), the expected phenotype of *Cac* cells which acquired the plasmid DNA (same as the  
 211 *Cac*-ptaHalo strain), and the observed phenotype of isolated clones from plate PtP4.5

| <i>Characteristic</i>                      | <i>Clj</i> -ptaHalo | Wild-type <i>Cac</i> | <i>Cac</i> -ptaHalo (p100ptaHalo) | Clones from PtP4.5 Plate |                            |
|--------------------------------------------|---------------------|----------------------|-----------------------------------|--------------------------|----------------------------|
| <i>Heat shock survival</i>                 | No                  | Yes                  | Yes                               | Yes                      | <b><i>Cac</i> Specific</b> |
| <i>Growth on glucose</i>                   | No                  | Yes                  | Yes                               | Yes                      |                            |
| <i>Growth on 2xYTG plate surface</i>       | No                  | Yes                  | Yes                               | Yes                      |                            |
| <i>Production of butanol &amp; acetone</i> | No                  | Yes                  | Yes                               | Yes                      |                            |
| <i>Growth on erythromycin</i>              | Yes                 | No                   | Yes                               | Yes                      | <b>Plasmid Specific</b>    |
| <i>HaloTag fluorescence</i>                | Yes                 | No                   | Yes                               | No                       |                            |
| <i>Production of isopropanol</i>           | No                  | No                   | No                                | No                       | <b>Co-culture Specific</b> |

212

213 **PCR and PacBio analyses of the *Cac*-P4.5 cells identifies them as *Cac* cells containing both**  
 214 ***erm* and *HaloTag* genes integrated into the *Cac* genome.** First, *Cac*-P4.5 total DNA was tested  
 215 for the presence of any *Clj*-ptaHalo genes. *Cac*-P4.5 cells were screened for five characteristic *Cac*  
 216 genes (*adc*, *ctfA*, *ctfB*, *adhE1*, key solvent-formation genes encoded on the native pSOL1  
 217 megaplasmid, & *thl*, encoded on the main chromosome), and 3 *Clj* genes (*sadh*, *23bdh*, & *rho*), as  
 218 described (14). There is no DNA-sequence homology of the *Cac* genes in *Clj* and vice versa.  
 219 Control PCR reactions with the pure WT *Cac* genomic DNA produced bands (~100 bp) only with  
 220 the *Cac*-specific primers (Figure 3A). Similarly, control reactions with the pure *Clj* genomic DNA  
 221 produced bands (~100 bp) only with the *Clj*-specific primers (Figure 3B). Thus, the primers  
 222 designed for the assay showed very high specificity for the target organism. PCR-assay results  
 223 from two colonies showed the presence of only *Cac* genes in the samples, with no *Clj* genes  
 224 detected (Figure 3C).

225 Three sets of primers were designed for the *erm* and the HaloTag genes to test the left (L) and  
226 right (R) flanks, as well as the middle (M) portions (Figure 4A). The flanking PCR reactions had  
227 one primer bind to either end of each gene, while the second primer would bind outside of the gene  
228 on the plasmid backbone (Figures 4A). Control PCR reactions for the *erm* gene showed identical  
229 results for both the total and p100ptaHalo DNA from the positive-control *Cac*-ptaHalo strain  
230 (Figure 4B). Total DNA from four individual colonies of the *Cac*-P4.5 clone was tested for the  
231 presence of the *erm* gene. The PCR reactions using the middle (M) and right (R) primer sets  
232 generated the expected bands (Figure 4C). The reaction using the left (L) set of primers generated  
233 a very faint band for three colonies, and no band from colony P4.5.3 (Figure 4C). Since the *Cac*-  
234 P4.5 strain was resistant to erythromycin, the *erm* gene sequence must be complete. Since the  
235 reaction using the left (L) set of primers did not generate the expected band, most likely the target  
236 sequence of the primer E1, which would bind to the left and outside of the *erm* gene, must be  
237 missing (Figure 4C). Since a faint band was visible for the (L) reaction, it is possible a few cells  
238 of the PtP4.5 clone might contain the full plasmid sequence, yet all efforts to isolate the  
239 p100ptaHalo plasmid from these clones failed. This implies that at least a portion of the  
240 p100ptaHalo plasmid, which contains the *erm* gene, was integrated into the *Cac*-P4.5 clone's  
241 genome, or that a portion of the DNA was deleted from the p100ptaHalo plasmid. This hypothesis  
242 is further supported by the lower intensity of the M & R bands produced from *Cac*-P4.5's DNA  
243 (Figure 4C), compared to bands generated from the *Cac*-ptaHalo's DNA (positive control; Figure  
244 4B). In both cases, the same amount of DNA template was used for the PCR reaction. *Cac*-ptaHalo  
245 cells contain multiple copies of the plasmid, and thus multiple copies of the *erm* gene, which  
246 resulted in the stronger PCR bands. If a portion of the p100ptaHalo plasmid integrated into *Cac*-  
247 P4.5's genome, each cell of that strain would only carry a single copy of the *erm* gene, resulting  
248 in less PCR product, and thus bands with lower intensity.

249 The same *Cac*-P4.5 DNA samples were tested for the presence of the HaloTag gene as well.  
250 Control PCR reactions for the HaloTag gene showed identical results for both the total and  
251 p100ptaHalo DNA from the positive-control *Cac*-ptaHalo strain (Figure 4D). All three PCR

252 reactions (L, M, R) of the HaloTag gene assay produced the expected bands in all four DNA  
253 samples from the *Cac*-P4.5 strain (Figure 4E). Why were the *Cac*-P4.5 cells non-fluorescent  
254 (Figure S2) when labeled with the HaloTag ligand if they did carry the HaloTag gene? The bands  
255 generated from *Cac*-P4.5's DNA had a lower intensity, compared again to the positive-control  
256 *Cac*-ptaHalo DNA sample (Figure 4D). As shown in the *erm* gene assay, this again implies that  
257 the *Cac*-P4.5 clone contains fewer HaloTag gene copies compared to the *Cac*-ptaHalo strain. This  
258 provides additional evidence for plasmid DNA integration into the *Cac*-P4.5 clone's genome. A  
259 single copy of the HaloTag gene would most likely not be able to produce enough of the HaloTag  
260 protein per cell to reach the detection threshold by flow cytometry. Examining the flow cytometric  
261 (Figure S2) and microscopic data (Figure S3) of PtP4.3 and PtP4.4 cells, it appears that there is a  
262 gradual loss of the free plasmid which is apparently complete by the 4<sup>th</sup> selection passage (plate  
263 PtP4.4).

264 Analysis of PacBio sequencing data from a P4.5 clone identified six reads that contained the  
265 *erm* gene or the HaloTag gene, three of which contained two full copies of the p100ptaHalo  
266 plasmid, with no homology to the *Cac* genome. A full copy of the plasmid was identified inserted  
267 in the chromosome at position 2,734,720, with ~3000 bp and ~6000 bp on either end of the read  
268 aligning to the genome, while two and a half copies of the plasmid were inserted into the  
269 chromosome at position 671,974, with ~7000 bp of the read corresponding to the *C.*  
270 *acetobutylicum* genome. While the low number of reads identified containing plasmid DNA was  
271 surprising, it is consistent with PacBio analyses of lineages P1.5 and P2.5, discussed below, which  
272 have higher numbers of plasmid reads and from which intact plasmid was isolated. Analysis of  
273 sequenced reads from *Cac*-P4.5 suggests that the plasmid is integrated into the chromosome at two  
274 loci. The integration of the plasmid into the genome, along with a small number of reads containing  
275 only plasmid DNA, supports the PCR analysis data, as well as the flow cytometric and microscopy  
276 data. The PacBio data suggests that there are very few copies of the *erm* and HaloTag genes present  
277 in each cell. Therefore, bands of lower intensity would be generated after PCR due to fewer copies  
278 of the genes as compared to the control (Figure 4). Additionally, very low levels of the HaloTag

279 protein would be present which explains the lack of signal in the presence of the HaloTag ligand  
280 in both the flow cytometric and microscopy data (Figures S2 & S3). The PacBio data were also  
281 used to successfully assemble, *de novo*, the complete *Cac* genome including the pSOL1  
282 megaplasmid, thus supporting the phenotypic characteristics of the *Cac*-P4.5 cells. No *Clj* DNA  
283 could be identified in the sequence data of the *Cac*-P4.5 cells. To support these findings, we also  
284 sequenced clones from P4.3 and P4.4. The P4.3 clone had six reads that contained at least 500 bp  
285 of the p100ptaHalo plasmid, with at least one end of the read corresponding to *Cac* genomic  
286 sequences (insertions at 525,552; 1,325,197; 1,823,332; 2,702,390; 2,779,170; and 3,413,786).  
287 Four reads from P4.4 contained at least 500 bp of the p100ptaHalo plasmid with at least one end  
288 corresponding to the *Cac* genome (insertions at 349,946; 780,069; 980,388; and 2,204,734).  
289 Furthermore, in contrast to P4.5, there were a few hundred reads containing *Clj* DNA (but no reads  
290 with both *Clj* and p100ptaHalo plasmid DNA) in P4.3, but considerably fewer reads in P4.4. Taken  
291 together, these data suggest a dynamic integration – under the antibiotic selective pressure – of the  
292 plasmid into the *Cac* genome at each subculture passage, as the loci of integration events changed  
293 and the number of integration events decreased with each passage. The presence of *Clj* DNA in  
294 P4.3 and P4.4 suggests that at earlier stages of lineage 4 DNA from both organisms co-existed.  
295 This is pursued further below.

296 In summary, p100ptaHalo plasmid DNA originating from the *Clj*-ptaHalo strain successfully  
297 transferred into WT *Cac* cells during the coculture. Over the course of the selection process, the  
298 p100ptaHalo integrated into *Cac*'s genomic DNA, creating the *Cac*-P4.5 clone. These integration  
299 events as well as detection of portions of the p100ptaHalo plasmid containing the *erm* and Halotag  
300 genes in the PacBio sequencing data explain the observed phenotype of the *Cac*-P4.5 clone. We  
301 confirmed that the *Clj* genome does not contain native conjugation machinery or mobile genetic  
302 elements that could be responsible for plasmid transfer to *Cac* by searching the reference genome  
303 using online Mobile Element Finder and ICEFinder tools (16, 17). No mobile genetic elements  
304 were detected in the *Clj* genome. Importantly, the reference *Clj* genome does not contain any ICEs,

305 indicating that the most likely cause of DNA exchange is via the observed cell fusion, and not  
306 other known means of DNA transfer such as conjugation.

307 **Clones PtP1.5 and PtP2.5 show evidence for the formation of persistent hybrid bacterial**  
308 **cells containing chromosomal DNA from both *C. acetobutylicum* and *C. ljungdahlii***

309 Subculturing of the other two cocultures resulted in the isolation of clones PtP1.5 and PtP2.5  
310 which exhibited a more complex and unexpected phenotype compared to the phenotype of *Cac*-  
311 P4.5 clones described above. Single colonies of subculture plates PtP1.5 and PtP2.5 were  
312 cultured in the liquid selection medium for analysis. Their phenotype was not consistent with  
313 either pure *Clj* or pure *Cac* strains (Table S1). Starting with the 3<sup>rd</sup> subculture, the PtP1.5 and  
314 PtP2.5 clones could not survive the heat-shock, as would be the case for *Clj*. The same two  
315 clones had *Cac*-like phenotypes, including growth on glucose only, butanol and acetone  
316 production, and colony growth on the 2xYTG plate surface (Table S1). Furthermore, both clones  
317 were Erm resistant, and HaloTag fluorescent. Most surprising was the production of high  
318 concentrations of isopropanol (~80 mM titers) by the PtP1.5 clone (Figure S5A & B), which  
319 should only be possible in the coculture of *Cac* and *Clj* or if hybrid *Cac/Clj* cells persist (14). In  
320 the coculture, *Cac* and *Clj* cells were found to undergo heterologous cell-to-cell fusion, which  
321 facilitates the exchange of proteins and RNA (12). Based on these data, these clones should  
322 contain characteristic genes of both *Cac* and *Clj* cells.

323 Detailed PCR analysis was performed as above to test for the presence of *Clj* or *Cac* genes and  
324 the *erm* and HaloTag genes. In all three tested individual colonies from PtP1.5 plate, the PCR data  
325 show that these clones carry all three *Clj* genes and all five *Cac* genes, as well as the full *erm* and  
326 HaloTag genes (Figure 5) with PCR-product band intensities similar to those produced with  
327 genomic DNA from the *Cac*-ptaHalo strain (positive control). We note the results shown in Figure  
328 5A would also be obtained from genomic DNA extracted from a mixture of *Cac* and *Clj* cells.  
329 These data then suggest that the PtP1.5 clones contained multiple copies of the *erm* and HaloTag  
330 genes, thus suggesting the presence of an intact p100ptaHalo plasmid. As shown in Figure S5C &  
331 D, PtP1.5 clones contain a small population of cells (1.3% to 8.0%) expressing the HaloTag protein

332 at levels that result in a strong enough red signal to be detected by flow cytometry. Therefore, at  
333 least some of the cells were able to maintain and express the p100ptaHalo plasmid over the course  
334 of the selection process. To confirm this, we were able to easily isolate the full p100ptaHalo  
335 plasmid from both sets of PtP1.5 and PtP2.5 clones. If hybrid *Cac/Clj* cells were only transient, it  
336 would be expected that over the course of multiple cell divisions, proteins from the other organism  
337 would be diluted, degraded, eventually disappearing over time, and the hybrid cells would revert  
338 back to their original identity. PacBio sequencing analyses of these two clones supports the  
339 formation of persistent hybrid cells. Mapping of the reads to the *Clj* and *Cac* reference genomes  
340 via PacBio SMRT Link analysis demonstrated that the full chromosome of each species (including  
341 the *Cac* pSOL1 native megaplasmid that carries all the genes for solvent formation) was present  
342 in the clonal populations, as well as the full p100ptaHalo plasmid. In lineage P1.5, there were six  
343 reads with both p100ptaHalo DNA and *Cac* DNA detected. In lineage P2.5, there were 44 reads  
344 that contained both p100ptaHalo plasmid DNA and *Cac* DNA, and five reads that contained both  
345 p100ptaHalo DNA and *Clj* DNA. Additionally, 259 reads were identified with >500 bp of  
346 p100ptaHalo plasmid from P1.5 and 7,016 reads from P2.5, which is consistent with isolation of  
347 intact plasmid from each of these lineages. The higher number of plasmid reads identified in P1.5  
348 and P2.5 also supports the low number of reads found in P4.5, from which intact plasmid could  
349 not be isolated.

350

### 351 **TEM examination of PtP1.5 and PtP2.5 clones identifies aberrant cell morphologies**

352 To probe the nature of clones from plates PtP1.5 and PtP2.5 further, we examined them  
353 morphologically after 24 hrs of culture using TEM. PtP1.5 cells had an ambiguous morphology,  
354 that resembled neither pure *Cac* nor pure *Clj* (Figure 6A & B, Figure S4 for comparison). TEM  
355 imaging of PtP2.5 cells also showed ambiguous and unexpected morphologies (Figure 6C & D).  
356 While most of the examined PtP2.5 cells displayed the mixed *Cac-Clj* morphology of hybrid cells,  
357 a few cells had an enormous length of more than 10  $\mu\text{m}$ . This morphological phenotype indicates  
358 that cell division does not function normally in cells containing protein, RNA, or DNA material

359 originating from the two organisms. These TEM images of PtP1.5 and PtP2.5 cells further support  
360 the possibility that a chromosomal DNA exchange took place between *Clj*-ptaHalo and WT *Cac*  
361 cells in the coculture, or during the subculturing process. While both chromosomes are present,  
362 key native properties of both *Cac* and *Clj* cells were lost. If pure WT *Cac* cells persisted, they  
363 would not have been Erm resistant, they would have been able to sporulate and thus resist heat  
364 shock, and would thus have developed the advanced sporulation forms like those seen in Figure 2.  
365 If pure *Clj* cells had persisted, they would not have been able to grow on 2xYTG plate surfaces  
366 and would display the characteristic homogeneous electron dense vegetative form in TEM analysis  
367 (12). Yet, the primary metabolic capabilities of *Cac* cells were preserved, as well as the unique  
368 metabolic phenotype of heterologous cell fusion: ability to form isopropanol and 2,3-butanediol  
369 without acetone and acetoin accumulation in the medium (12, 14). These data further support the  
370 concept of persistent hybrid cells containing both chromosomes.

371 The enlarged cells observed in the PtP2.5 clone (Figure 6C & D) were also observed in the  
372 PtP4.3 clone (Figure S3), but not in PtP4.5 (Figure 2). This is consistent with the PacBio  
373 sequencing data whereby a small number of reads aligning to *Clj* DNA were detected in P4.3, but  
374 considerably fewer reads (10-fold) were detected in P4.4, and no *Clj* DNA was detected in P4.5.  
375 An interpretation would be that expression of *Clj* genes coded on the detected *Clj* DNA in P4.3  
376 would result in expression of *Clj* proteins that interfere with the morphological development of  
377 *Cac*.

378

## 379 **DISCUSSION**

380 The goal of this study was to examine the possibility of DNA transfer between *Clj*-ptaHalo and  
381 WT *Cac* cells in co-culture (Figure 7), in addition to the large-scale exchange of protein and RNA  
382 reported previously (12). It was assumed that if any DNA exchange does occur, it would be a less  
383 frequent event, compared to the protein and RNA exchange. Thus, a selection process was  
384 designed to identify any WT *Cac* that acquired plasmid DNA from *Clj*-ptaHalo (Figure 1). The  
385 selection process generated cells with two unique phenotypes. First, the *Cac*-P4.5 clone was



386 isolated with the expected phenotype of a *Cac* cell (heat-shock survival, butanol & acetone  
387 production, no isopropanol nor 2,3-butanediol production, and expected TEM morphology)  
388 carrying the *erm* and HaloTag genes from the p100ptaHalo plasmid from the *Clj*-ptaHalo strain.  
389 Furthermore, the p100ptaHalo plasmid DNA has been integrated into the *Cac*-P4.5 genome, which  
390 was unexpected. There are relatively few reads in P4.5 that show integration, given the genome  
391 coverage of the sequencing data. Even in P1.5 and P2.5, where we see relatively high numbers of  
392 reads with plasmid DNA, we see a low number of reads indicating integration events in the *Cac*  
393 genome. The low read numbers are most likely due to the standard protocol employed for PacBio  
394 sequencing whereby reads higher than 6 kb were selected for sequencing. We speculate that free  
395 plasmid DNA survived the size selection process, whereas chromosomal DNA did not. As already  
396 argued, the coculture mediated cell fusion must have facilitated this successful transfer of plasmid  
397 DNA from *Clj*-ptaHalo to WT *Cac*. Second, the isolated PtP1.5 and PtP2.5 clones displayed a  
398 coculture-only phenotype of isopropanol and 2,3-butanediol production after five rounds of  
399 selection, designed to enrich for *Cac* cells. The possibility of a tight microcolony of distinct *Cac*  
400 and *Clj* cells can be discounted as the PtP1.5 strain could not survive the heat shock. Since these  
401 clones produce the characteristic solvents of *Cac* cells, the clones must contain the solventogenic  
402 genes, which are coded on the pSOL1 megaplasmid. Yet these clones are not heat-shock resistant.  
403 Survival and persistence of pure *Clj*-ptaHalo cells is unlikely due to the selection conditions (only  
404 glucose as a carbon substrate) during the five subcultures. The data therefore suggest that a large-  
405 scale exchange of chromosomal DNA has occurred between *Clj*-ptaHalo and the WT *Cac*, forming  
406 persistent & permanent hybrid cells. This allowed for the persistence of coculture phenotype in  
407 PtP1.5 and PtP2.5 clones.

408 The exchange of plasmid, and possibly genomic, DNA in the coculture is strong evidence for  
409 a novel mechanism of HGT in bacteria. Control transformation experiments showed that the  
410 restriction-modification systems of *Cac* and *Clj* are incompatible (data not shown), making the  
411 DNA transfer through a transformation route not possible between these two organisms. There is  
412 also no evidence of transduction via prophage excision and transfer of DNA. *Clj* does have a large



413 51 kb prophage, and 3 more prophages scored as questionable or incomplete by the PHASTER  
414 online search tool (18, 19). *Cac* also has a 65 kb complete prophage and a 9 kb incomplete  
415 prophage, supported by previous Papoutsakis lab analysis (data not shown) (18, 19). If prophage  
416 excision was responsible for transfer of the plasmid DNA, we would expect that the plasmid first  
417 integrated into the *Clj* chromosome near a prophage region and then was excised and transferred  
418 to *Cac* along with prophage genes. PacBio analysis did not identify any reads with both plasmid  
419 sequence and *Clj* DNA in the P1.5 clone. Five reads containing both plasmid and *Clj* DNA were  
420 identified in the P2.5 clone; however, none of these reads mapped to regions of the *Clj* genome  
421 with prophage genes. No *Clj* DNA was detected in the P4.5 clone. Furthermore, there is no  
422 evidence of conjugative machinery in either *Cac* or *Clj*, meaning neither organisms can act as a  
423 donor cell during conjugation. Thus, the observed exchange of DNA in the coculture must have  
424 been facilitated through cell-to-cell fusion events that occur in the *Cac-Clj* cocultures. Cell fusion  
425 between these two organisms was found to facilitate large-scale exchange of protein and RNA  
426 (12), and, thus, it appears that plasmid-DNA exchange also took place during some fusion events.  
427 Formation of transient hybrid cells (exchange of protein and RNA only) may allow any transferred  
428 plasmid DNA to escape the restriction-modification of the recipient organism. At this point this  
429 mechanism is unclear. We did the best we could to examine the DNA content of isolated colonies  
430 originating presumably from single cells. To provide a definitive understanding of the events that  
431 took place and led to the observed phenotypes, one needs to be able to visualize the presence of  
432 chromosomal and plasmid DNA from the two parent cells in single cells during the selection  
433 process of Figure 1. This will require the development of new bioimaging technology not currently  
434 available for prokaryotic cells, such as the DNA PAINT technology (20-22).

435 Beyond the transfer of plasmid DNA, and possibly the generation of hybrid cells carrying,  
436 temporarily at least, two different chromosomes, heterologous fusion events would also facilitate  
437 the exchange of chromosomal DNA and notably mobile genetic elements, which are integrated in  
438 most prokaryotic genomes and can dynamically excise and reinsert (23, 24). For example, the *Cac*  
439 genome does contain an IS1595-like insertion sequence, which encodes a transposase

440 (CA\_RS07810). *C. acetobutylicum* ATCC 824 encodes 7 additional transposase genes (locus tags  
441 CA\_RS01390, CA\_RS03555, CA\_RS03565, CA\_RS03880, CA\_RS08330, CA\_RS13010,  
442 CA\_RS18140). While all but one of the transposases either contain premature stop codons or  
443 encode only partial proteins, one or more of these transposases could be responsible for dynamic  
444 insertion and excision of the p100ptaHalo plasmid into the *Cac* genome. Evidence for movement  
445 of the plasmid or portions of the plasmid is seen in the PacBio data, as the plasmid is inserted in  
446 different locations in the genome in each generation of the P4 lineage. Thus, it is clear that  
447 heterologous fusion events can easily lead to novel cellular structures and phenotypes, such as  
448 those depicted in Figures 6 and S3, and such cellular entities may lead to novel evolutionary  
449 trajectories in prokaryotic biology, with important implications in environmental sciences and  
450 human and animal health.

451 Heteroresistance has been discussed and defined in the context of a single species, where  
452 “subpopulations of seemingly isogenic bacteria exhibit a range of susceptibilities to a particular  
453 antibiotic” (25). Additional qualifications have been proposed and the characteristic instability  
454 frequently associated with heteroresistance has been discussed (26). Here, all lineages of cultures  
455 shown in Figure 1 demonstrate a form of *Cac* heteroresistance to Erm, as *Cac* survives the presence  
456 of high concentrations (100 µg/mL) of Erm from the very first subculturing passage of all lineages.  
457 Moreover, we also observed that *Clj* cells displayed an unexpected phenotype in this syntrophic  
458 coculture: formation of colonies on the surface of 2xYTG plates, which, although not captured by  
459 the heteroresistance definition, involves acquisition of a distinct phenotypic trait not available to  
460 *Clj*. While the precise means by which these phenotypes occur remain to be elucidated, one could  
461 envision several plausible scenarios, all based on interspecies interactions. One possibility is the  
462 formation of tight microcolonies of *Clj*-ptaHalo with WT *Cac* cells, but this was discounted as  
463 discussed above. A second possibility would be immediate transfer of the p100ptaHalo plasmid to  
464 WT *Cac* cells, which while certainly possible, it appears less likely early on, such as during the  
465 PX.1 passages. Had that happened, subsequent, fast (24 hour) selective passages would have  
466 resulted in the isolation of *Cac* cells carrying the p100ptaHalo plasmid, while eliminating the *Clj*-

467 ptaHalo cells, neither of which happened for lineages 1 and 2. A third possibility is the immediate  
468 formation of hybrid cells carrying both chromosomes and the p100ptaHalo plasmid, and there is  
469 evidence for such cells even in primary parent cultures (Figure 8 of Ref. (12)). Another possibility  
470 is the transient transfer of the Erm protein from the *Clj*-ptaHalo to WT *Cac* cells, as part of the  
471 massive exchange of proteins between these organisms under syntrophic co-culture conditions.  
472 While this is a most likely occurrence, such transient acquisition of the Erm protein would not  
473 have persisted in subsequent selective subcultures.

474

## 475 **MATERIALS AND METHODS**

476 **Microorganisms and culture media.** Monocultures of *C. acetobutylicum* (ATCC 824; *Cac*), the  
477 fluorescent *C. ljungdahlii* strain, *Clj*-ptaHalo (13), and the co-cultures thereof, were grown in  
478 Turbo CGM medium, as described previously (12, 14). Briefly, Turbo CGM used for *Clj*-ptaHalo  
479 mono-cultures was supplemented with 5 g/L fructose, and were grown in sealed bottles with 20  
480 psig of H<sub>2</sub>/CO<sub>2</sub> gas mixture (80/20%). Turbo CGM used for *Cac* mono-cultures, and co-cultures  
481 was supplemented with 5 g/L fructose and 80 g/L glucose, and were grown in unsealed glass  
482 bottles in the anaerobic chamber (12, 14).

483

484 **Monoculture preparation and growth.** *Cac* frozen stocks were streaked onto 2xYTG plates and  
485 cultured in Turbo CGM to generate seed cultures (14). *Clj*-ptaHalo frozen stocks were inoculated  
486 into liquid Turbo CGM and passaged as needed to generate seed cultures, and were supplemented  
487 with erythromycin (100 µg/mL) to maintain the plasmid DNA. The culture pH was adjusted to 5.2  
488 after 12 hours of growth with sterile deoxygenated 1 M NaOH to prevent acid death, as needed in  
489 *Cac* mono-cultures (14).

490

491 **Coculture setup.** Co-cultures of *Cac* and *Clj*-ptaHalo were prepared as reported (12, 14). Briefly,  
492 5 mL of exponentially-growing *Cac* seed cultures (OD<sub>600</sub> of 1.0-2.0) were mixed with 90 mL of  
493 exponentially-growing *Clj*-ptaHalo seed cultures (OD<sub>600</sub> of 0.4-0.6). The *Clj*-ptaHalo cells were

494 spun down at 5,000 rpm and washed twice in the fresh Turbo CGM medium to remove any residual  
495 erythromycin, before using them for coculture setup. The cocultures used for the DNA transfer  
496 were prepared at the R of ~10, where R is the ratio of *Clj* cells to *Cac* cells at the start of the co-  
497 culture (14), to ensure an excess of the plasmid-carrying *Clj*-ptaHalo cells (14). Co-cultures were  
498 performed in unpressurized static 100 mL glass bottles in the anaerobic chamber, with a total liquid  
499 volume of 30 mL. The pH of each coculture was adjusted to 5.2 with the sterile and deoxygenated  
500 NaOH after ~12 hrs of growth to prevent the acid death (14). All coculture fermentations were  
501 performed using the Turbo CGM medium supplemented with 80 g/L of glucose and 5 g/L of  
502 fructose. No erythromycin was used in the starting parent cocultures.

503

504 **Selection procedure.** After 24 hrs of the initial (parent) coculture, samples were collected for  
505 selection in order to isolate any *Cac* cells that acquired the p100ptaHalo plasmid (carrying the  
506 HaloTag gene and the erythromycin resistance gene; see ref. (13) for details) from the *Clj*-ptaHalo.  
507 The selection was done in liquid medium and solid plates. The liquid selection medium was the  
508 Turbo CGM medium containing 80 g/L of glucose, no fructose and 100 µg/mL of erythromycin.  
509 The liquid selection cultures were done in unsealed 100 mL bottles in the anaerobic chamber. The  
510 plate selection was done on 2xYTG plates, containing 5 g/L of glucose, no fructose, and 100 µg/mL  
511 of erythromycin. During the liquid and solid selection, the presence of only high glucose  
512 concentration (a *Cac* substrate), but no fructose (*Clj* substrate), was expected to enrich the original  
513 cocultures samples in *Cac* cells, while eliminating *Clj*-ptaHalo over the course of the selection.  
514 The selection media also contained the erythromycin (100 µg/mL) in order to eliminate WT *Cac*  
515 cells during the selection process, and over time isolate only *Cac* cells that acquired the plasmid  
516 p100ptaHalo DNA (or parts of it) in the coculture. The subcultured clones isolated at any point  
517 during the selection process were designated as PX.#, where 'X' represents the different starting  
518 (parent) co-cultures, while the '#' represents the specific subculture stage (passage). Plate  
519 subculture selection is indicated by PtPX.#. To start the selection process, 5 mL samples from each  
520 mother coculture were washed in Turbo CGM medium (80 g/L of glucose only, no fructose) and

521 transferred to 25 mL of the liquid selection medium. The coculture samples were washed to remove  
522 any fructose left over from the coculture growth medium. This was the 1<sup>st</sup> selection passage PX.1  
523 (Figure 1). After 24 hrs of growth, 5 mL samples from each PX.1 culture were collected, washed,  
524 and transferred to fresh 25 mL of the selection liquid medium (passage PX.2). After 24 hrs of  
525 incubation, samples from PX.2 cultures were streaked onto 2xYTG selection plates (PtPX.3) to  
526 begin isolating and testing single colonies of each clone. The selection plates developed colonies  
527 after 2 days of incubation at 37°C, except the selection plate PtP3.3. Multiple colonies (8-10) were  
528 picked from each selection plate, and were cultured in the liquid selection medium (80 g/L glucose,  
529 100 µg/mL erythromycin). Half of the selected colonies were heat-shocked at 80°C for 10 minutes  
530 (per standard *Cac* culture techniques) to check whether the colonies from each plate were able to  
531 sporulate. All colonies that grew in the liquid selection medium were streaked again on the 2xYTG  
532 selection plate (plate PtPX.4), and the process was repeated one more time (plate PtPX.5) to further  
533 enrich each clone. Colonies from plates PtP1.5, PtP2.5, and PtP4.5 were grown in the selection  
534 liquid medium to generate cells for microscopy, flow-cytometry, HPLC, and PCR analysis.

535

536 **Transmission Electron Microscopy (TEM).** Samples from cultures PtP1.5, PtP2.5, and PtP4.5  
537 were collected after 24 hrs of growth, fixed in 2% glutaraldehyde and 2% paraformaldehyde in  
538 0.1M sodium cacodylate buffer (pH 7.4) and stored at 4°C until further processing. The TEM  
539 sample processing and imaging was performed as described previously (12).

540

541 **Confocal Fluorescence Microscopy.** Samples from the PtP4.3 cultures were collected after 24  
542 hrs of growth, and labeled with the HaloTag-specific Janelia Fluor®646 red ligand as described  
543 previously (12, 13). Labeled cells were placed in Nunc Lab-Tek chamber slides coated with poly-  
544 L-lysine. Cells were incubated for 1 hr to immobilize cells on the poly-L-lysine coating. After 1  
545 hr, the chamber was rinsed with PBS thrice to remove excess cells, as described previously (12,  
546 13). Immobilized cells were imaged using Elyra PS.1 super-resolution microscope (Carl Zeiss).  
547 Each sample was imaged using a 63x/1.4 oil objective, as described previously (12, 13).

548

549 **Flow cytometry and fluorescent labeling of cells.** Samples from passage cultures P1.5, P2.5, and  
550 P4.5 were collected, and labeled with the HaloTag-specific Janelia Fluor®646 red ligand as  
551 described previously (12, 13) to determine if the isolated cells still produced the HaloTag protein.  
552 The flow cytometry analysis was performed as described previously (12, 13).

553

554 **HPLC metabolite analysis.** Colonies from isolated strains P1.5, and P4.5 were grown in the liquid  
555 selection medium (Turbo CGM, 80 g/L glucose, no fructose, 100 µg/mL erythromycin) for 40 hrs,  
556 with pH control at 12 hrs, to determine the fermentation profile of each isolated passage line. The  
557 samples were collected approximately every 10-12 hrs for the HPLC analysis. The HPLC analysis  
558 was performed as described previously (14).

559

560 **Plasmid isolation from isolated clones.** Cell samples of wild-type *Cac*, wild-type *Clj*, *Cac*-  
561 *ptaHalo*, *Clj-ptaHalo*, and clones PtP1.5, PtP2.5, and PtP4.5 were used for plasmid isolation, using  
562 the NucleoSpin Plasmid Mini Kit (Macherey-Nagel) according to manufacturer's protocol. To test  
563 for the presence of a complete p100ptaHalo plasmid, the resulting plasmid preparations from each  
564 clone were transformed into chemically-competent NEB 5-alpha *E. coli* cells per the standard  
565 transformation protocol. Following transformation, *E. coli* cells were incubated at 37°C for one  
566 hour, after which 150 µL of each transformation were plated on LB plates supplemented with 100  
567 µg of ampicillin (p100ptaHalo plasmid contained Amp<sup>R</sup> marker for *E. coli* transformation). The  
568 LB plates were incubated at 37°C for 24 hrs to allow *E. coli* colonies to develop. Plasmid  
569 preparations from clones PtP1.5 and PtP2.5 produced *E. coli* colonies, indicating that the complete  
570 plasmid DNA was present in those samples. Plasmid preparations from PtP4.5 did not produce  
571 any colonies, indicating the complete plasmid was not present in this clone.

572

573 **PCR analysis of genomic and plasmid DNA.** Genomic and plasmid DNA was extracted from  
574 isolated strains P1.5, and P4.5, as well as WT *Cac* (negative control), WT *Clj* (negative control)

575 and *Cac*-ptaHalo (positive control) for PCR analysis. Genomic DNA was extracted using the  
576 DNeasy Blood & Tissue Kit (Qiagen, Germany), following the procedure for Gram positive  
577 bacteria (14). Plasmid DNA was extracted using the NucleoSpin Plasmid DNA Kit (Macherey-  
578 Nagel, Germany).

579 Genomic samples extracted from isolated strains P1.5 and P4.5 were first tested by PCR using  
580 primers to target five selected *Cac* genes (*adc*, *ctfa*, *ctfb*, *adhe*, *thl*) and three *Clj* genes (*sadh*,  
581 *23bdh*, *rho*) to determine if pure *Cac* was isolated in each line during the selection process. Primers  
582 used to screen for the selected *Cac* and *Clj* genes have been used previously (14). PCR was  
583 performed using the green 2X Taq polymerase master mix (Fisher, MA). Each reaction was  
584 performed under the following conditions: initial 5 min denaturation at 95°C; followed by 25  
585 cycles of 30 sec denaturation at 95°C, 30 sec annealing at 65°C, and 30 sec extension at 72°C;  
586 finished with 5 min extension at 72°C. All primer sets were designed to have the same annealing  
587 temperature of 65°C.

588 Genomic and plasmid DNA samples from isolated strains P1.5 and P4.5 were also tested for  
589 the presence of the HaloTag, and erythromycin resistance (*erm*) genes. Three primer sets were  
590 designed for each gene, where the left pair (L) spanned the 5'-end of the gene and the plasmid  
591 backbone DNA located to the left of the gene, the middle pair (M) spanned a region of each gene  
592 in the middle, and the right pair (R) spanned the 3'-end of the gene and the plasmid backbone  
593 DNA located to the right. This is summarized visually in the Figure 4, while the primer sequences  
594 are shown in Table S2. PCR was performed using the green 2X Taq polymerase master mix  
595 (Fisher, MA). Each reaction for the *erm* gene (L, M, R) was performed under the following  
596 conditions: initial 5 min denaturation at 95°C; followed by 25 cycles of 30 sec denaturation at  
597 95°C, 30 sec annealing at 53°C, and 35 sec extension at 72°C; finished with 5 min extension at  
598 72°C. Each reaction for the HaloTag gene (L, M, R) was performed under the same conditions as  
599 above, except the annealing temperature was 53°C for these primer pairs (see Table S2).

600



601 **Whole-genome PacBio Sequencing and Bioinformatics.** High molecular weight (HMW) DNA  
602 was isolated from Cac-P4.5 cells (originating from the PtP4.5 selection plate) using the MagAttract  
603 HMW DNA Kit (Qiagen) according to the manufacturer's instructions. Single molecule real time  
604 sequencing was performed at the University of Delaware DNA Sequencing and Genotyping  
605 Center. DNA libraries were constructed according to the PacBio standard protocol. SMRTbell  
606 DNA libraries were constructed as described previously (27). Briefly, DNA libraries were  
607 constructed according to the PacBio standard protocol. Both libraries were size-selected starting  
608 at 6 kb and with an average library size of 10 kb, as measured by Fragment Analyzer (Advanced  
609 Analytical Technologies, Inc.). DNA Sequencing was performed on PacBio Sequel II Single-  
610 Molecule Sequencer (Pacific Biosciences, Menlo Park, CA) instrument using P4-C2 chemistry,  
611 mag-bead loading and 3-h movie time. Reads from each clone were assembled into contigs using  
612 SMRT Analysis version 10.1 through the SMRT Portal. The CCS (Circular Consensus Sequence)  
613 tool from PacBio SMRT Tools v10.1 was used to calculate the consensus sequences from the  
614 subreads in the PacBio data for each sample. The CCS reads were then aligned to the *erm* gene,  
615 HaloTag gene, and the entire p100ptaHalo plasmid using BLASTn (v2.11.0) (28). Reads aligning  
616 to more than 500 contiguous base pairs of either the *erm* gene, HaloTag gene, or the plasmid were  
617 then mapped to the *Cac* reference genome (GCF\_000008765.1) to identify possible integration  
618 sites using minimap2 (v2.1) (29). These reads were also aligned to the *Cac* reference genome using  
619 BLASTn to filter by alignment length and percent identity. In addition, the presence of *Clj* DNA  
620 in each sample was examined by mapping the reads to the *Clj* reference genome  
621 (GCF\_000143685.1) and identifying which reads mapped to *Clj* better than *Cac* and to *Clj* only.  
622 The presence of *Clj* DNA with plasmid was examined by aligning the PacBio reads that contained  
623 more than 500 contiguous base pairs of plasmid to the *Clj* reference genome (GCF\_000143685.1)  
624 using BLASTn. Online tools ICEFinder, Mobile Element Finder, and PHASTER were used to  
625 search the reference genomes of *C. acetobutylicum* ATCC 824 and *C. ljungdahlii* DSM 13528  
626 genomes for integrative and conjugative elements, mobile genetic elements and prophages,  
627 respectively (16-19).

628 **Acknowledgements.** This work was supported by a grant from the Army Research Office (award  
629 W911NF-19-1-0274) and unrestricted institutional funds available to ETP. Microscopy equipment  
630 was acquired with a shared instrumentation grant (grant S10 OD016361), and access was



631 supported by the NIH-NIGMS (grant P20 GM103446), by the NSF (grant IIA-1301765) and by  
632 the State of Delaware. Support from the University of Delaware CBCB Bioinformatics Core  
633 Facility and use of the BIOMIX compute cluster was made possible through funding from  
634 Delaware INBRE (NIH NIGMS P20 GM103446), the State of Delaware, and the Delaware  
635 Biotechnology Institute. We thank Shannon Modla & Jeffrey L. Caplan of UD Bio-Imaging Center  
636 for assistance in TEM and confocal microscopies, Olga Shevchenko of UD DNA Sequencing &  
637 Genotyping Center for assistance with PacBio sequencing, and Madolyn Macdonald & Shawn  
638 Polson of UD Center for Bioinformatics and Computational Biology for assistance with PacBio  
639 sequencing data analysis.

640

#### 641 **AUTHOR CONTRIBUTIONS**

642 ETP conceived the project. ETP and KC designed the experiments; KC with ETP performed  
643 culture experiments. GJG performed DNA isolation and data analysis for PacBio sequencing. ETP,  
644 KC, and GJG analyzed the data and wrote the manuscript.

645

#### 646 **References**

647

- 648 1. Thomas CM, Nielsen KM. 2005. Mechanisms of, and barriers to, horizontal gene transfer  
649 between bacteria. *Nat Rev Microbiol* 3:711-21.
- 650 2. Grohmann E, Muth G, Espinosa M. 2003. Conjugative plasmid transfer in gram-positive  
651 bacteria. *Microbiology and Molecular Biology Reviews* 67:277-+.
- 652 3. Johnston C, Martin B, Fichant G, Polard P, Claverys JP. 2014. Bacterial transformation:  
653 distribution, shared mechanisms and divergent control. *Nature Reviews Microbiology*  
654 12:181-196.
- 655 4. Low KB, Porter DD. 1978. Modes of Gene Transfer and Recombination in Bacteria.  
656 *Annual Review of Genetics* 12:249-287.
- 657 5. Griffith F. 1928. The Significance of Pneumococcal Types. *Journal of Hygiene* 27:113-  
658 159.
- 659 6. Wozniak R, Waldor M. 2010. Integrative and conjugative elements: mosaic mobile  
660 genetic elements enabling dynamic lateral gene flow. *Nat Rev Microbiol* 8:552-563.
- 661 7. Wisniewski J, Rood J. 2017. The T<sub>cp</sub> conjugation system of *Clostridium perfringens*.  
662 *Plasmid* 91:28-36.

- 663 8. Woolley R, Pennock A, Ashton R, Davies A, Young M. 1989. Transfer of Tn1545 and  
664 Tn916 to *Clostridium acetobutylicum*. *Plasmid* 22:169-174.
- 665 9. Bertram J, Strätz M, Dürre P. 1991. Natural transfer of conjugative transposon Tn916  
666 between gram-positive and gram-negative bacteria. *J Bacteriol* 173:443-448.
- 667 10. Volk W, Bizzini B, Jones K, Macrina F. 1988. Inter- and intrageneric transfer of Tn916  
668 between *Streptococcus faecalis* and *Clostridium tetani*. *Plasmid* 19:255-259.
- 669 11. Anderson KL, Megehee JA, Varel VH. 1998. Conjugal transfer of transposon Tn1545  
670 into the cellulolytic bacterium *Eubacterium cellulosolvens*. *Letters in Applied*  
671 *Microbiology* 26:35-37.
- 672 12. Charubin K, Modla S, Caplan JL, Papoutsakis ET. 2020. Interspecies Microbial Fusion  
673 and Large-Scale Exchange of Cytoplasmic Proteins and RNA in a Syntrophic  
674 *Clostridium* Coculture. *mBio* 11.
- 675 13. Charubin K, Streett H, Papoutsakis ET. 2020. Development of Strong Anaerobic  
676 Fluorescent Reporters for *Clostridium acetobutylicum* and *Clostridium ljungdahlii* Using  
677 HaloTag and SNAP-tag Proteins. *Appl Environ Microbiol* 86.
- 678 14. Charubin K, Papoutsakis ET. 2019. Direct cell-to-cell exchange of matter in a synthetic  
679 *Clostridium* syntrophy enables CO<sub>2</sub> fixation, superior metabolite yields, and an expanded  
680 metabolic space. *Metab Eng* 52:9-19.
- 681 15. Cornillot E, Nair RV, Papoutsakis ET, Soucaille P. 1997. The genes for butanol and  
682 acetone formation in *Clostridium acetobutylicum* ATCC 824 reside on a large plasmid  
683 whose loss leads to degeneration of the strain. *Journal of Bacteriology* 179:5442-5447.
- 684 16. Johansson M, Bortolaia V, Tansirichaiya S, Aarestrup F, Roberts A, Petersen T. 2021.  
685 Detection of mobile genetic elements associated with antibiotic resistance in *Salmonella*  
686 *enterica* using a newly developed web tool: MobileElementFinder. *J Antimicrob*  
687 *Chemother* 76:101-109.
- 688 17. Liu M, Li X, Xie Y, Bi D, Sun J, Li J, Tai C, Deng Z, Ou H. 2019. ICEberg 2.0: an  
689 updated database of bacterial integrative and conjugative elements. *Nucleic Acids Res*  
690 47:D660-D665.
- 691 18. Arndt D, Grant J, Marcu A, Sajed T, Pon A, Liang Y, Wishart D. 2016. PHASTER: a  
692 better, faster version of the PHAST phage search tool. *Nucleic Acids Res* 44.
- 693 19. Zhou Y, Liang Y, Lynch K, Dennis J, Wishart D. 2011. PHAST: a fast phage search tool.  
694 *Nucleic Acids Res* 39:W347-52.
- 695 20. Filius M, Cui TJ, Ananth AN, Docter MW, Hegge JW, van der Oost J, Joo C. 2020.  
696 High-Speed Super-Resolution Imaging Using Protein-Assisted DNA-PAINT. *Nano*  
697 *Letters* 20:2264-2270.
- 698 21. Geertsema HJ, Aimola G, Fabricius V, Fuerste JP, Kaufer BB, Ewers H. 2021. Left-  
699 handed DNA-PAINT for improved super-resolution imaging in the nucleus. *Nature*  
700 *Biotechnology* 39:551-+.
- 701 22. Nieves DJ, Gaus K, Baker MAB. 2018. DNA-Based Super-Resolution Microscopy:  
702 DNA-PAINT. *Genes* 9.
- 703 23. Scott J, Thompson-Mayberry P, Lahmamsi S, King CJ, McShan WM. 2008. Phage-  
704 Associated Mutator Phenotype in Group A *Streptococcus*. *Journal of Bacteriology*  
705 190:6290-6301.
- 706 24. Ramisetty BCM, Sudhakari PA. 2019. Bacterial ‘Grounded’ Prophages: Hotspots for  
707 Genetic Renovation and Innovation. *Frontiers in Genetics* 10.

- 708 25. El-Halfawy OM, Valvano MA. 2015. Antimicrobial Heteroresistance: an Emerging Field  
709 in Need of Clarity. *Clinical Microbiology Reviews* 28:191-207.
- 710 26. Andersson DI, Nicoloff H, Hjort K. 2019. Mechanisms and clinical relevance of bacterial  
711 heteroresistance. *Nature Reviews Microbiology* 17:479-496.
- 712 27. Sandoval NR, Venkataramanan KP, Groth TS, Papoutsakis ET. 2015. Whole-genome  
713 sequence of an evolved *Clostridium pasteurianum* strain reveals Spo0A deficiency  
714 responsible for increased butanol production and superior growth. *Biotechnol Biofuels*  
715 8:227.
- 716 28. Camacho C, Coulouris G, Avagyan V, Ma N, Papadopoulos J, Bealer K, Madden TL.  
717 2009. BLAST+: architecture and applications. *BMC Bioinformatics* 10:1-9.
- 718 29. Li H. 2018. Minimap2: pairwise alignment for nucleotide sequences. *Bioinformatics*  
719 34:3094-3100.
- 720
- 721

722

## Figures

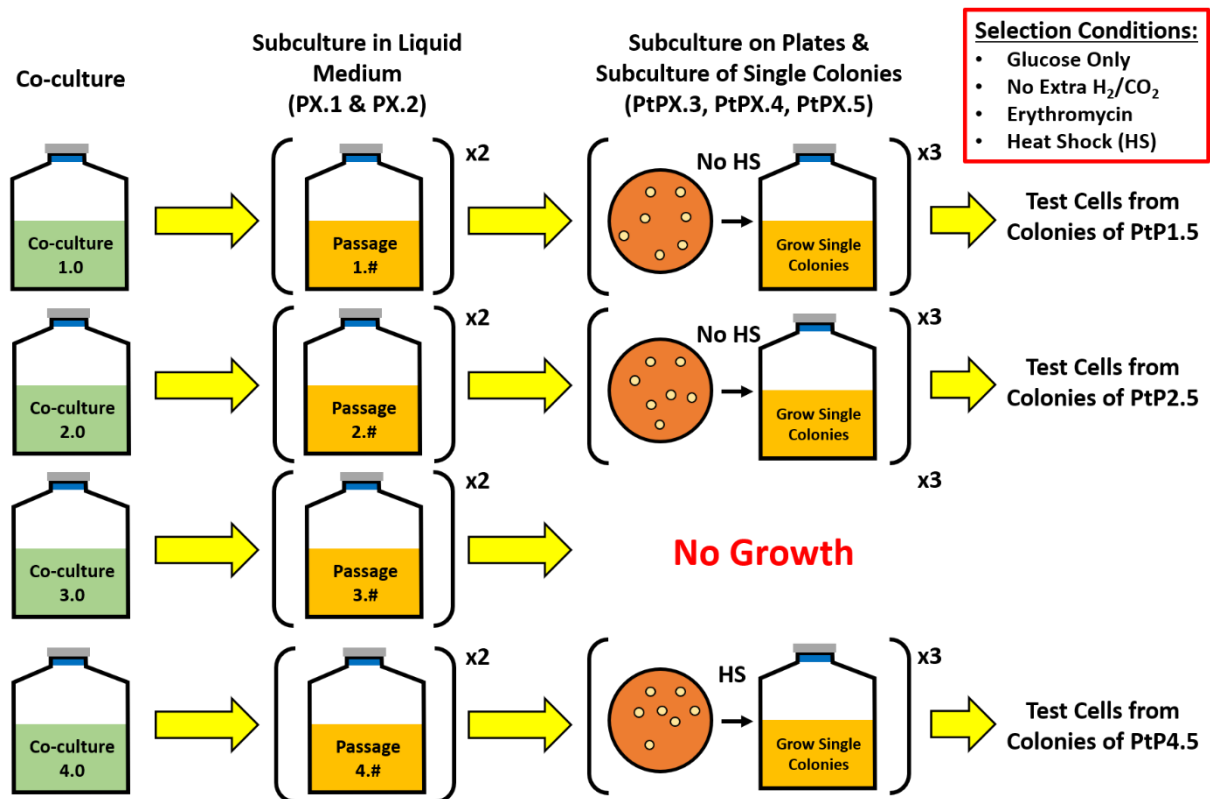

**Figure 1.** Summary of the selection procedure for isolating *Cac* strains, which have acquired p100ptaHalo plasmid DNA from *Clj*-ptaHalo cells in the coculture. Selection started with four parent cocultures (selection lines) on growth medium containing 80 g/L glucose and 5 g/L fructose but no erythromycin (Erm). Subculture passages 1 and 2 (PX.1, and PX.2; X represents the starting biological replicate of cocultures 1 through 4) were enrichment passages in selective liquid media containing glucose as the sole carbon source and Erm. Samples from the enriched cultures PX.2 were plated on selective plates (Erm, glucose) to identify and isolate single colonies of PtPX.3 strains. Selection subculture P3.2 did not survive on plates and was abandoned. Selection subcultures PtP1.3 and PtP2.3 (and all subsequent subcultures) could not survive heat-shock, indicating the lack of sporulation ability, and were subcultured without heat-shock for further analysis. Selective subculture PtP4.3 (and all subsequent subcultures) survived the heat-shock, indicating the presence of *Cac* cells capable of sporulation. Each subculture in liquid selection medium is represented as PX.#, where ‘X’ represents the parent coculture, while the ‘#’ represents each subsequent subculture (passage). Subcultures on selective plates are indicated as PtPX.#.

723

724

725

726

727  
728

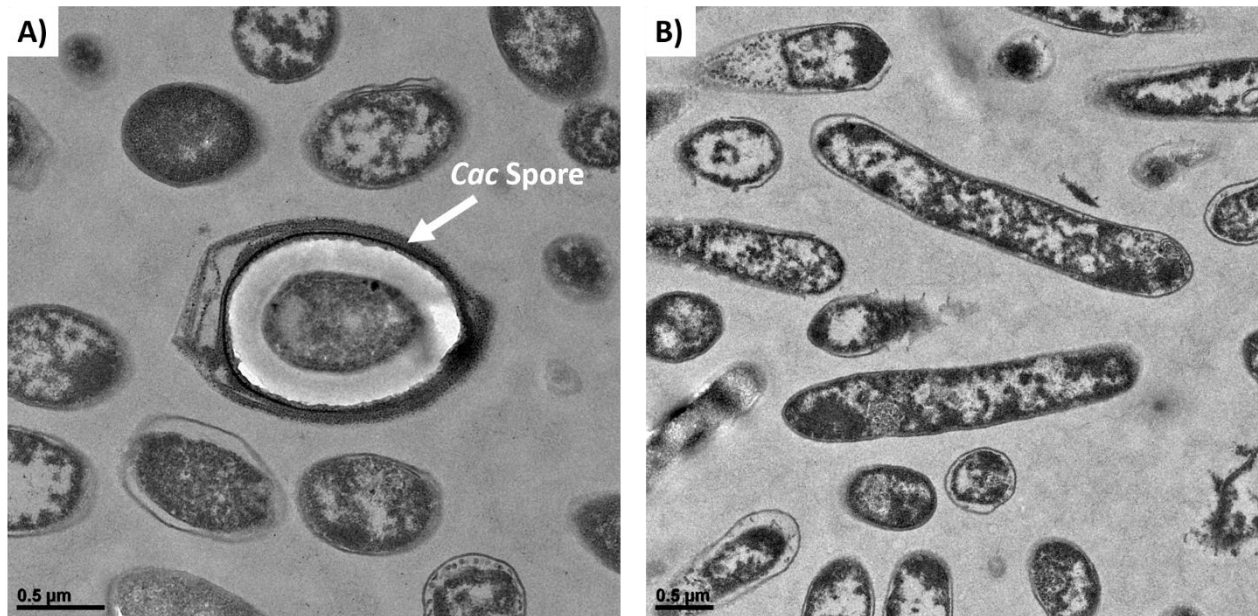

**Figure 2.** TEM imaging of clones from the PtP4.5 plate. (A) A fully formed *Cac* spore. (B) *Cac*-P4.5 cells showing the formation of granulose, which are the large white & translucent regions expected of sporulating wild-type *Cac* cells.

729  
730  
731  
732  
733  
734  
735  
736  
737  
738  
739  
740

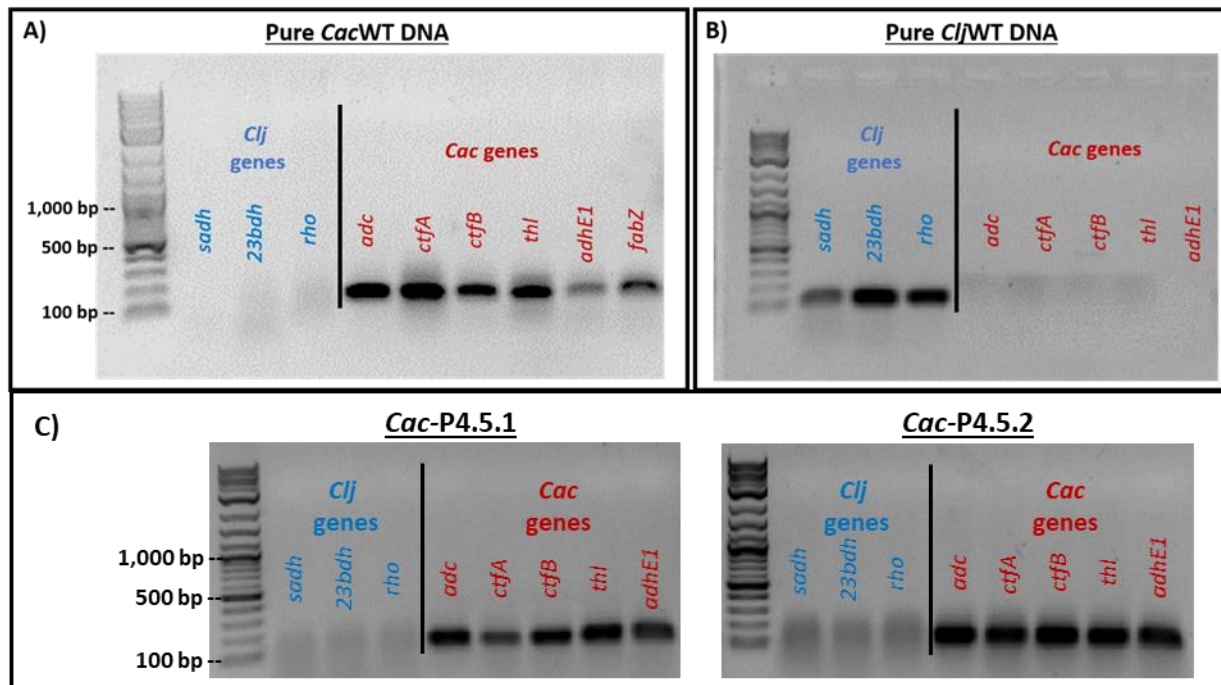

741

**Figure 3.** PCR control reactions with the selected primer sets on pure wild-type *Cac* and *Clj* genomic DNA. Three genes from *Clj* and five genes from *Cac* were targeted. (A) *Cac*-specific genes generated the expected ~100 bp bands from the *Cac* genomic DNA template, while the *Clj*-specific primers did not. (B) *Clj*-specific genes generated the expected ~100 bp bands from the *Clj* genomic DNA template, while the *Cac* primers did not produce any bands. Therefore, all primer sets chosen for each organism were highly specific for their target organism. (C) PCR assays used to test genomic DNA of the *Cac*-P4.5 clones for three *Clj*-specific and five *Cac*-specific genes. Results from two colonies (clones) are shown.



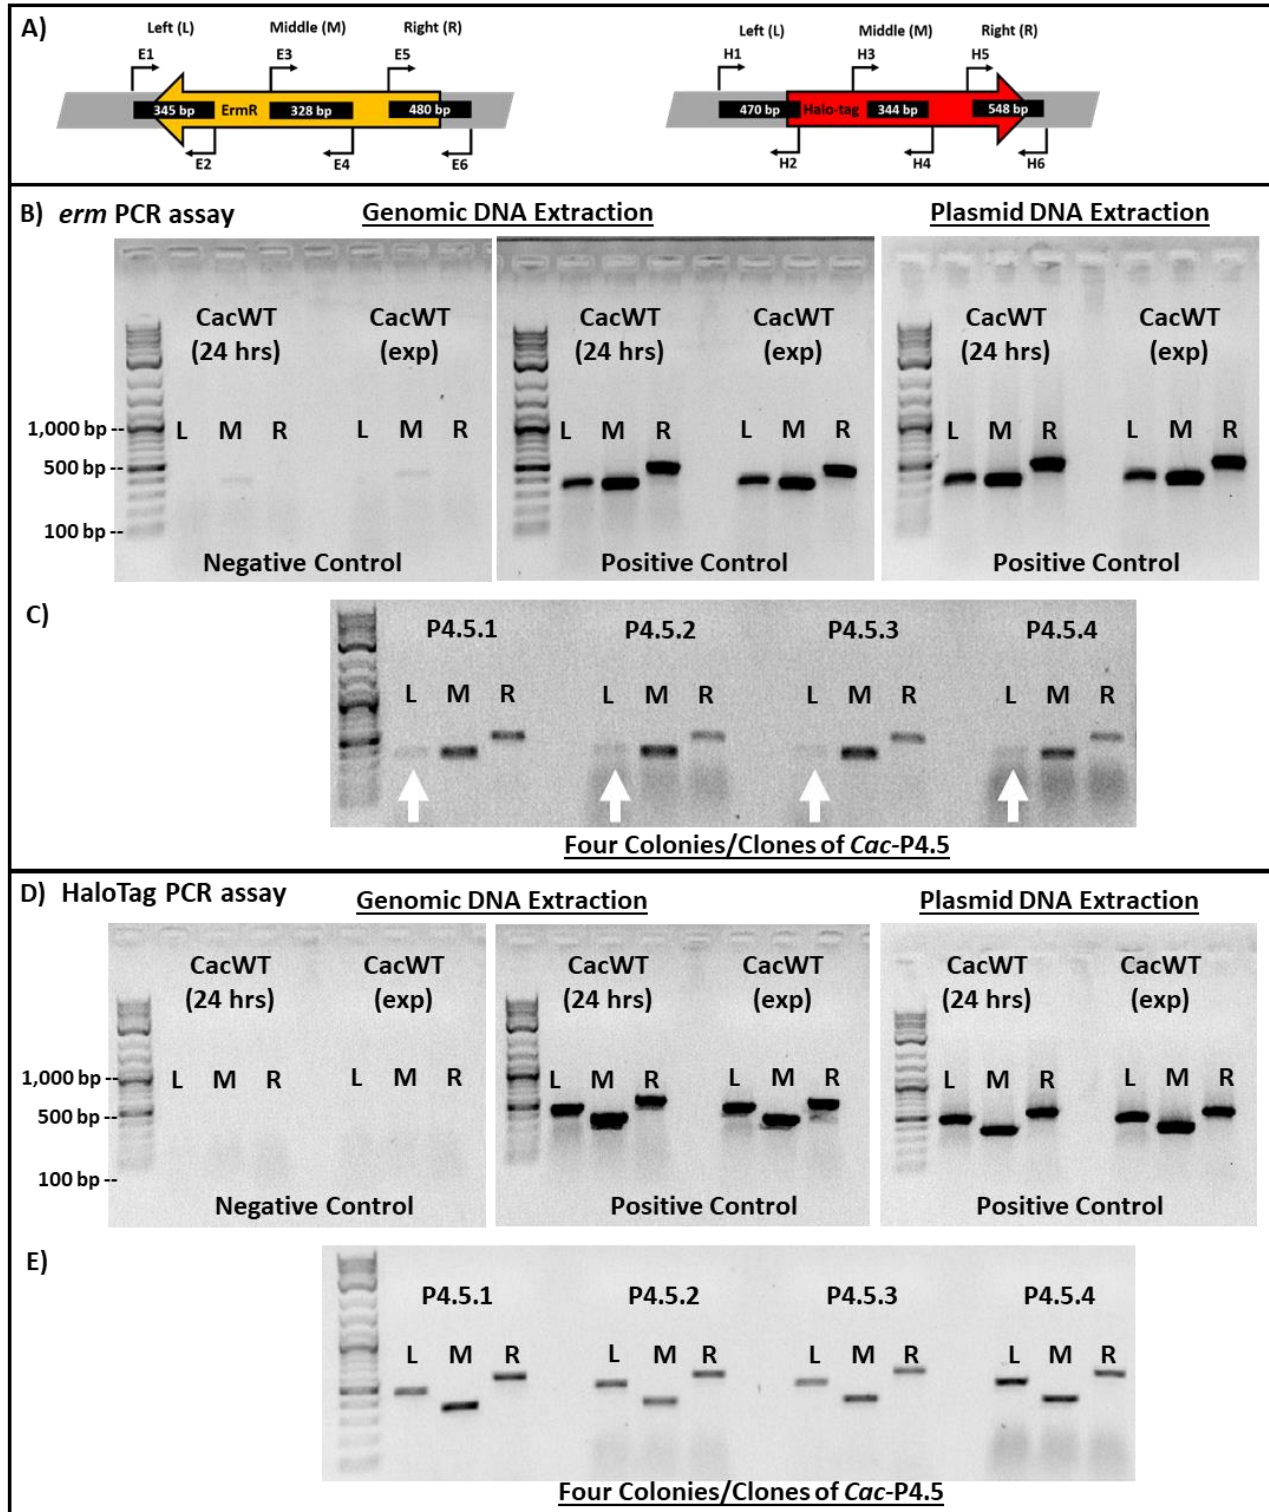

742  
743  
744

745

**Figure 4.** (A) Three primer pairs were designed to bind to the left (L), in the middle (M), and to the right (R) of the *erm* and HaloTag genes. Primers E1 and H1 bind outside of each gene to the left, while primers E6 and H6 bind outside of each gene to the right, to test whether the original plasmid backbone was still present in the tested cells. (B) PCR assays to test the presence of the *erm* gene on the p100ptaHalo plasmid using negative control genomic DNA from the wild-type *Cac* or positive control DNA from *Cac*-ptaHalo. (C) PCR assays used to detect the *erm* gene using DNA from cultures initiated from four *Cac*-P4.5 clones (colonies). DNA from the *Cac*-P4.5 clone did not generate sharp, strong L bands (white arrows). The M and R reactions worked as expected. (D) PCR assays to test the presence of the HaloTag gene on the p100ptaHalo plasmid using negative control genomic DNA from the wild-type *Cac* or positive control DNA from *Cac*-ptaHalo. (E) PCR assays on the DNA isolated from the *Cac*-P4.5 clones produced all three expected bands, implying the entire gene is present. The bands in all four samples had a lower intensity compared to the positive control. The same amount of the DNA template was used in all *erm* and Halo PCR assays. Each individual colony selected for the assay were grown in the liquid selection medium until they reached optical density of 1.0-2.0. Cells collected from each culture were used for genomic DNA extraction.

746

747

748

749

750

751

752



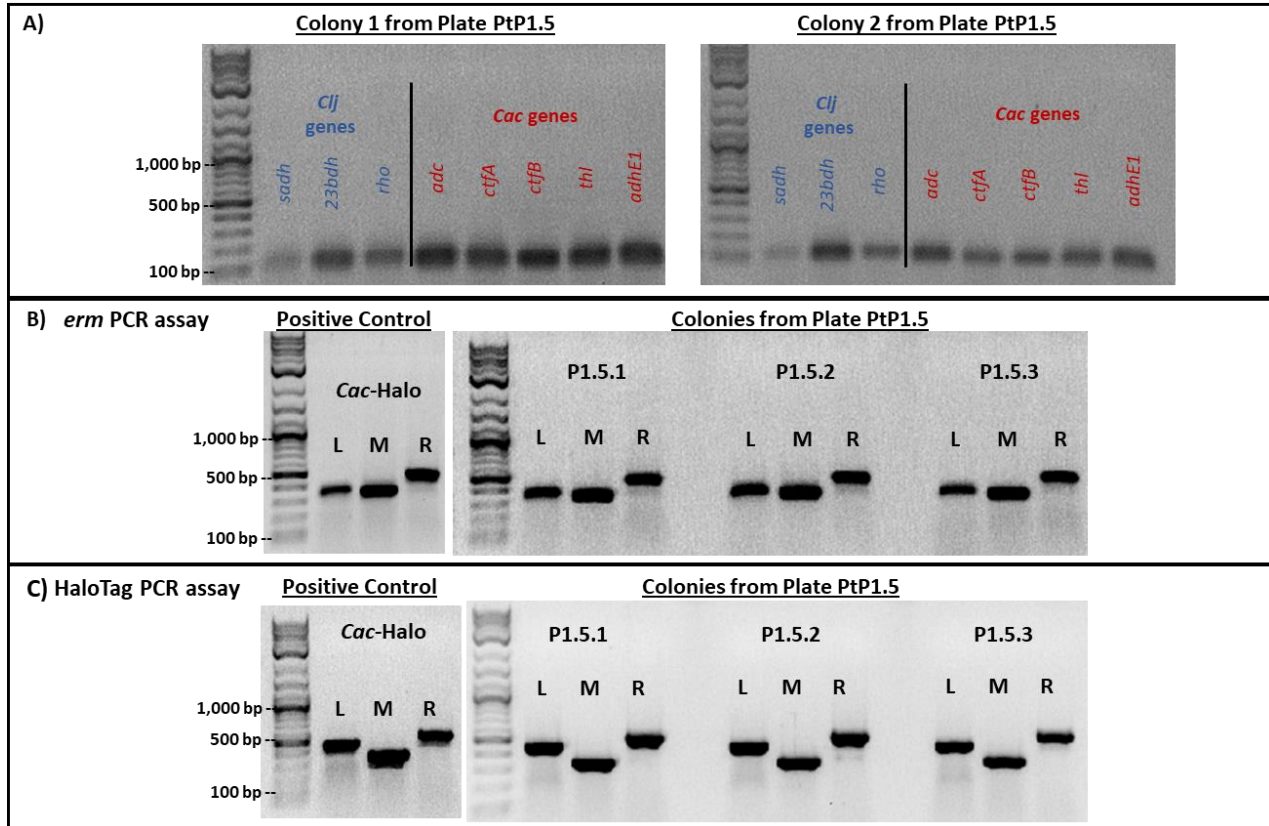

753

**Figure 5.** (A) PCR assays to test genomic DNA of PtP1.5 clones for three *Clj* (blue) and five *Cac* (red) genes. Results from two individual colonies are shown. Both were positive for the *Clj* and *Cac*-specific genes. (B) PCR assays used to detect the *erm* gene in PtP1.5 clone. DNA from the positive control produced the expected reaction products (bands), with strong intensity for the left (L), middle (M), and right (R) reactions. DNA extracts from three PtP1.5 colonies produced all three reaction products (bands); band intensities were similar to those of positive control. (C) PCR assays used to detect the HaloTag gene in PtP1.5 clones. DNA from the positive control produced the expected reaction products (bands), with strong intensity for the left (L), middle (M), and right (R) reactions. DNA from three PtP1.5 colonies produced all expected reaction products (bands). Band intensity was similar to that observed in the positive control. The same amount of DNA template was used in each PCR reaction. PtP1.5 colonies were picked from a PtP1.5 plate and subcultured in liquid selective medium until cells reached an optical density of 1.0-2.0. Harvested cells were used for DNA extraction.

754  
755  
756  
757

758

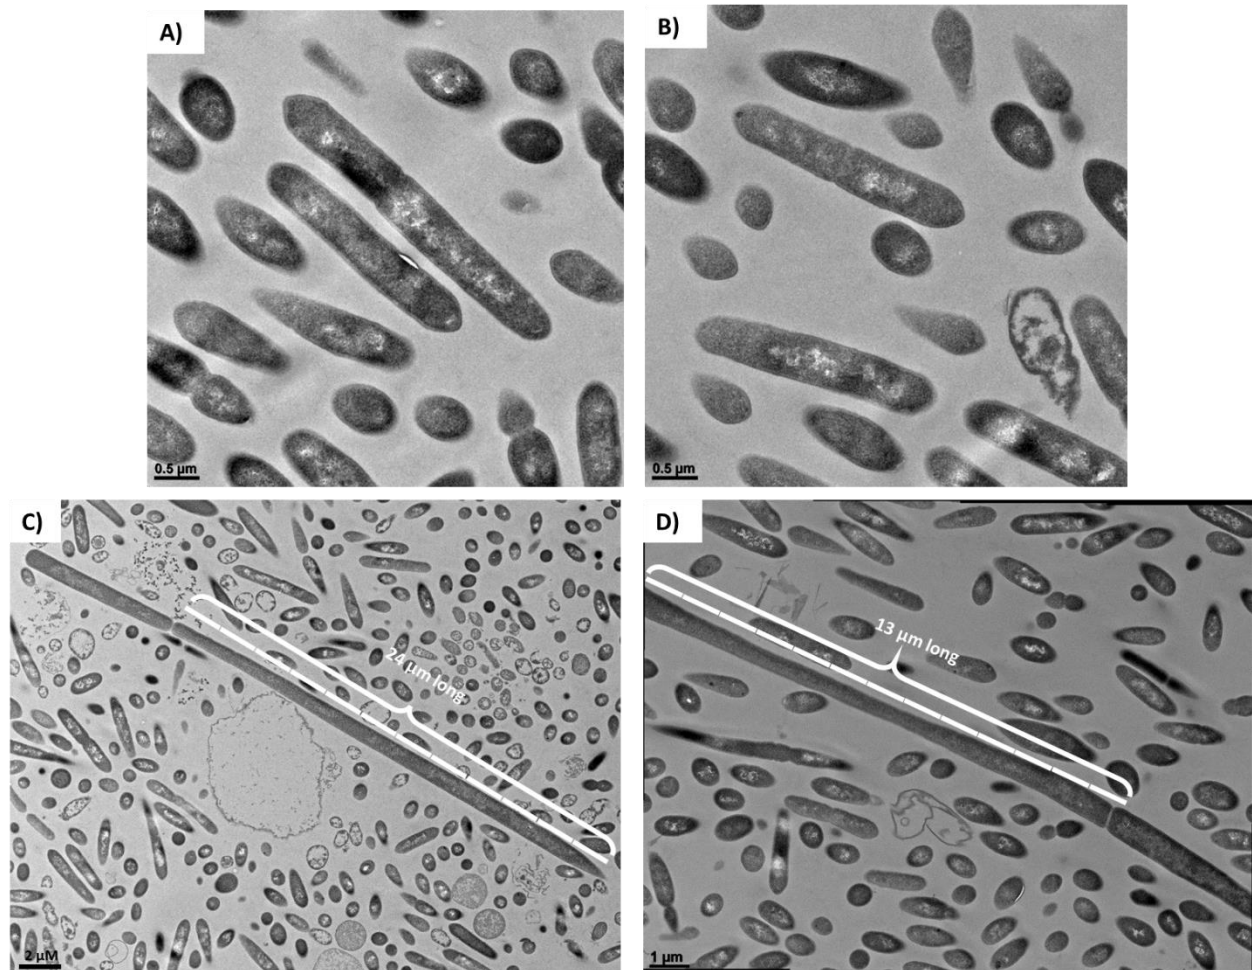

759

760

761 **Figure 6.** (A) and (B) TEM imaging of PtP1.5 cells after 24 hrs of a culture initiated from a  
762 single colony on a selective plate. All cells had an ambiguous morphology, displaying some  
763 differentiation and granulose formation (*Cac*-specific phenotype), but not as pronounced and  
764 defined as would be expected of pure *Cac* cells (compare to Figures 2 and S4). (C) and (D) TEM  
765 imaging of PtP2.5 cells after 24 hrs of a culture initiated from a single colony from a selective  
plate. All cells had an ambiguous morphology, displaying some differentiation and granulose-  
like formation similar to the PtP1.5 cells. A few cells in the sample had an enormous length of  
>10 μm, which is >5 times the size of a normal *Cac* or *Clj* cell (2 μm length).

766  
767

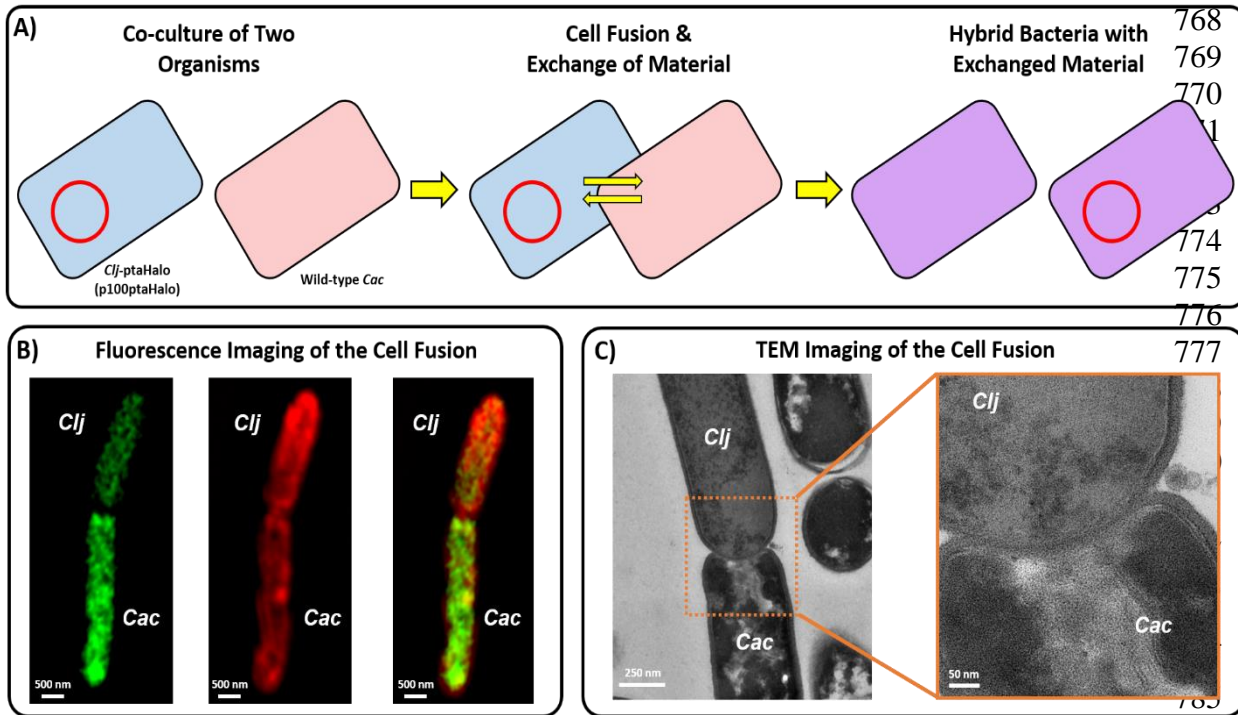

**Figure 7.** (A) Proposed mechanism of DNA transfer in the syntrophic coculture of *C. acetobutylicum* and *C. ljungdahlii*. Neither organism is known to possess any conjugation machinery. The restriction modification (RM) systems of the two organisms are incompatible, thus prevent any natural transformation from occurring. Thus, the observed DNA transfer must occur via the cell-to-cell fusion observed in the coculture system. (B) Fluorescence images (from Ref. <sup>1</sup>) of heterologous cell-to-cell fusion between *C. acetobutylicum* and *C. ljungdahlii*, which facilitates the exchange of protein, RNA, and DNA between the two organisms. (C) Transmission-electron microscopy (TEM) images (from Ref. <sup>1</sup>) of heterologous cell-to-cell fusion between the two organisms.
